# Supplementary material
Source: PubMed Central journal article supplement (PMC5864550)

Graphic Abstract: Exposure to particulate fine matter (PM<sub>2.5</sub>) may partly mediate racial differences in CVD and mortality.

**PM<sub>2.5</sub> Concentration, Black Vs. White**

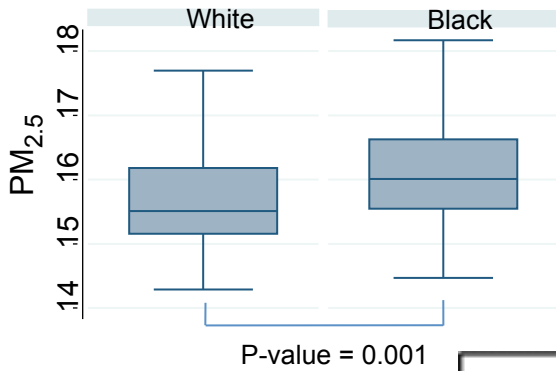

**Adjusting Race-CVD association for PM<sub>2.5</sub>**

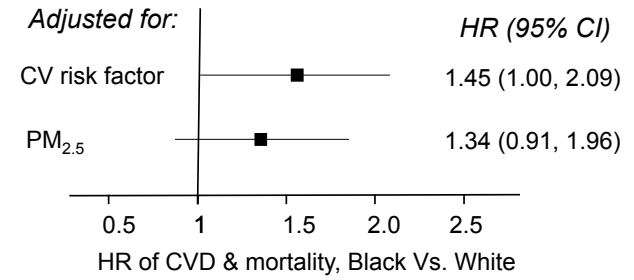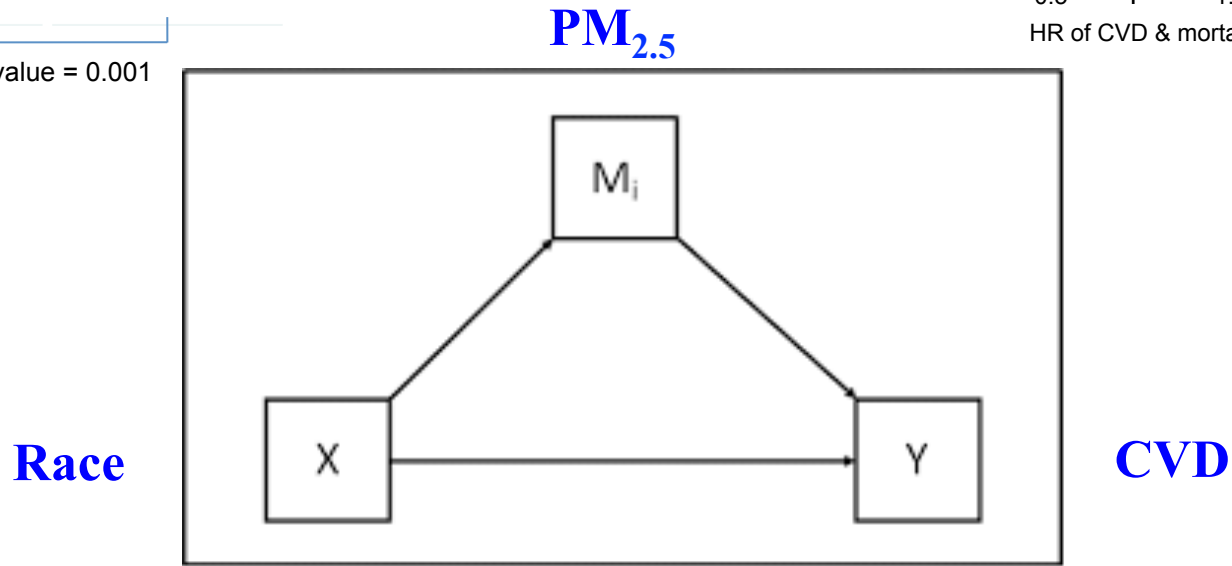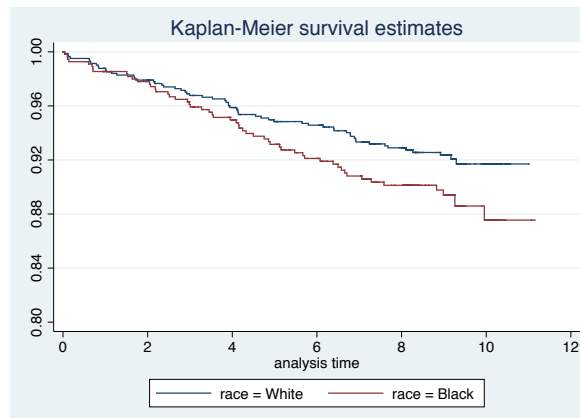

Supplement: NIHMS941156-supplement-Graphic_Abstract.pdf [file NIHMS941156-supplement-Graphic_Abstract.pdf]
