# Supplementary material
Source: PubMed Central journal article supplement (PMC5864550)
Supplement: NIHMS941156-supplement-Supplemental_tables.pdf [file NIHMS941156-supplement-Supplemental_tables.pdf]

## Supplemental Material

Supplemental Table I. Baseline characteristics of participants by Black Carbon

| Variable                 | Overall summary statistics |                | Summary statistics by thirds of BC |                |              |                |           |                | z value |
|--------------------------|----------------------------|----------------|------------------------------------|----------------|--------------|----------------|-----------|----------------|---------|
|                          | No of subjects             | Mean (SD) or % | Bottom Third                       |                | Middle Third |                | Top Third |                |         |
|                          |                            |                | n                                  | Mean (SD) or % | n            | Mean (SD) or % | n         | Mean (SD) or % |         |
| BC (abs)                 | 1717                       | 1.17 (0.12)    | 602                                | 1.06 (0.04)    | 574          | 1.16 (0.03)    | 541       | 1.32 (0.10)    |         |
| Age (years)              | 1717                       | 59 (8)         | 602                                | 59 (7)         | 574          | 59 (8)         | 541       | 60 (8)         | 0.057   |
| Female                   | 1717                       | 1129 (66%)     | 602                                | 363 (60%)      | 574          | 397 (69%)      | 541       | 369 (68%)      | 0.021   |
| Race - Black             | 1717                       | 773 (45%)      | 602                                | 181 (30%)      | 574          | 311 (54%)      | 541       | 281 (52%)      | <0.000  |
| Race - White             | 1717                       | 902 (53%)      | 602                                | 404 (67%)      | 574          | 253 (44%)      | 541       | 245 (45%)      | 1       |
| Smoker                   | 1713                       | 192 (11%)      | 601                                | 55 (9%)        | 572          | 76 (13%)       | 540       | 61 (11%)       | 0.42    |
| Diabetes                 | 1710                       | 177 (10%)      | 601                                | 60 (10%)       | 570          | 59 (10%)       | 539       | 58 (11%)       | 0.32    |
| HTN                      | 1715                       | 757 (44%)      | 602                                | 241 (40%)      | 572          | 264 (46%)      | 541       | 252 (47%)      | 0.0037  |
| Systolic BP              | 1715                       | 137 (20)       | 601                                | 136 (19)       | 573          | 137 (20)       | 541       | 137 (20)       | 0.55    |
| Diastolic BP             | 1714                       | 81 (10)        | 600                                | 81 (10)        | 573          | 81 (10)        | 541       | 81 (10)        | 0.089   |
| Glucose (mg/dl)          | 1711                       | 99 (26)        | 600                                | 98 (26)        | 571          | 99 (26)        | 540       | 101 (27)       | 0.046   |
| BMI (Kg/M <sup>2</sup> ) | 1701                       | 30 (6)         | 594                                | 29 (6)         | 569          | 31 (7)         | 538       | 30 (7)         | 0.16    |
| WHR                      | 1584                       | 0.89 (0.09)    | 553                                | 0.90 (0.09)    | 533          | 0.89 (0.08)    | 498       | 0.88 (0.09)    | 0.13    |
| fRHI                     | 1232                       | 0.74 (0.46)    | 449                                | 0.77 (0.45)    | 397          | 0.71 (0.46)    | 386       | 0.73 (0.46)    | 0.48    |
| Log-hsCRP (log-mg/l)     | 1611                       | 0.37 (1.24)    | 566                                | 0.29 (1.23)    | 532          | 0.39 (1.29)    | 513       | 0.43 (1.18)    | 0.16    |
| Log-IL6 ((log-pg/ml)     | 1585                       | 0.53 (0.75)    | 558                                | 0.46 (0.74)    | 521          | 0.54 (0.77)    | 506       | 0.60 (0.72)    | 0.0027  |
| TC (mg/dL)               | 1705                       | 213 (42)       | 596                                | 212 (39)       | 571          | 214 (44)       | 538       | 213 (44)       | 0.67    |
| HDL (mg/dL)              | 1705                       | 58 (15)        | 596                                | 56 (15)        | 571          | 58 (15)        | 538       | 59 (15)        | 0.012   |
| Log-TG (mg/dL)           | 1704                       | 4.67 (0.49)    | 596                                | 4.72 (0.50)    | 571          | 4.66 (0.48)    | 537       | 4.63 (0.49)    | 0.028   |
| Income < \$10K           | 1554                       | 93 (6.0)       | 549                                | 22 (4.0)       | 517          | 41 (7.9)       | 488       | 30 (6.2)       |         |
| Income - \$10K-20K       | 1554                       | 201 (12.9)     | 549                                | 44 (8.0)       | 517          | 70 (13.5)      | 488       | 87 (17.8)      |         |
| Income - \$20K-40K       | 1554                       | 451 (29.0)     | 549                                | 148 (27.0)     | 517          | 162 (31.3)     | 488       | 141 (28.9)     | <0.000  |
| Income - \$40K-80K       | 1554                       | 515 (33.1)     | 549                                | 194 (35.3)     | 517          | 159 (30.8)     | 488       | 162 (33.2)     | 1       |
| Income > \$80K           | 1554                       | 294 (18.9)     | 549                                | 141 (25.7)     | 517          | 85 (16.4)      | 488       | 68 (13.9)      |         |
| Education < HS           | 1713                       | 42 (2.5)       | 602                                | 11 (1.9)       | 571          | 12 (2.1)       | 540       | 19 (3.5)       |         |
| Education- HS+           | 1713                       | 844 (49.3)     | 602                                | 266 (44.2)     | 571          | 299 (52.4)     | 540       | 279 (51.7)     | 0.0093  |
| Education- Bachelor+     | 1713                       | 827 (48.3)     | 602                                | 325 (54.0)     | 571          | 260 (45.5)     | 540       | 242 (44.8)     |         |

BC – black carbon, HTN- hypertension, BP – blood pressure, BG – blood glucose, BMI – body mass index, WHR – waist-hip ratio, fRHI - Framingham reactive hyperemia index, Hx – history, hsCRP –high sensitivity C-reactive protein, IL6 – interleukin-6, TC – total cholesterol, HDL-c – high-density lipoprotein cholesterol, TG – triglycerides.

Supplemental Table II. Baseline characteristics of participants by race

| Variable                 | White          |                  | Black          |                | p-value |
|--------------------------|----------------|------------------|----------------|----------------|---------|
|                          | No of subjects | Mean (SD) or N % | No of subjects | Mean (SD) or % |         |
| PM <sub>2.5</sub>        | 902            | 15.7 (0.73)      | 773            | 16.1 (0.75)    | <0.0001 |
| BC                       | 902            | 1.16 (0.13)      | 773            | 1.19 (0.11)    | <0.0001 |
| Age (years)              | 1095           | 60 (7)           | 854            | 58 (8)         | <0.0001 |
| Female                   | 1095           | 687 (63%)        | 854            | 593 (69%)      | 0.002   |
| Current smoker           | 1093           | 89 (8%)          | 851            | 125 (15%)      | <0.0001 |
| Diabetes                 | 1089           | 60 (6%)          | 850            | 139 (16%)      | <0.0001 |
| Hypertension             | 1093           | 342 (31%)        | 853            | 484 (57%)      | <0.0001 |
| Systolic BP              | 1094           | 133 (19)         | 853            | 141 (20)       | <0.0001 |
| Diastolic BP             | 1093           | 79 (10)          | 853            | 83 (10)        | <0.0001 |
| Glucose (mg/dl)          | 1091           | 96 (18)          | 852            | 103 (34)       | <0.0001 |
| BMI (Kg/M <sup>2</sup> ) | 1084           | 29 (6)           | 844            | 32 (7)         | <0.0001 |
| Waist-hip ratio          | 1012           | 0.89 (0.09)      | 797            | 0.89 (0.09)    | 0.77    |
| fRHI                     | 835            | 0.80 (0.46)      | 579            | 0.66 (0.44)    | <0.0001 |
| Log-hsCRP                | 1039           | 0.16 (1.19)      | 790            | 0.63 (1.26)    | <0.0001 |
| Log-IL6                  | 1025           | 0.36 (0.74)      | 775            | 0.75 (0.69)    | <0.0001 |
| TC (mg/dL)               | 1091           | 216 (41)         | 846            | 209 (44)       | 0.0001  |
| HDL-c (mg/dL)            | 1091           | 57 (15)          | 846            | 58 (15)        | 0.14    |
| Log-trig_vap             | 1090           | 4.76 (0.51)      | 845            | 4.58 (0.47)    | <0.0001 |
| Education < HS           | 1091           | 17 (2%)          | 853            | 27 (3%)        | <0.0001 |
| Education - HS+          | 1091           | 446 (41%)        | 853            | 521 (61%)      |         |
| Education – Bachelor+    | 1091           | 628 (58%)        | 853            | 305 (36%)      |         |
| Income < \$10K           | 974            | 29 (3%)          | 787            | 79 (10%)       | <0.0001 |
| Income - \$10K-20K       | 974            | 71 (7%)          | 787            | 145 (18%)      |         |
| Income - \$20K-40K       | 974            | 248 (25%)        | 787            | 257 (33%)      |         |
| Income - \$40K-80K       | 974            | 338 (35%)        | 787            | 247 (31%)      |         |
| Income > \$80K           | 974            | 288 (30%)        | 787            | 59 (7%)        |         |

PM<sub>2.5</sub> – particulate matter with median aerodynamic diameter < 2.5 µm, HTN- hypertension, BP – blood pressure, BMI – body mass index, WHR – waist-hip ratio, fRHI - Framingham reactive hyperemia index, Hx – history, BP – blood pressure, hsCRP –high sensitivity C-reactive protein, IL6 – interleukin-6, TC – total cholesterol, HDL-c – high-density lipoprotein cholesterol, TG – triglycerides.

Supplemental Table III. Association of environmental exposure to BC (per 0.5 abs higher concentration) with continuous variables

| <b>Outcome</b> | <b>Adjustment</b> | <b>N</b> | <b>Beta (95% CI)</b> | <b>p-value</b> |
|----------------|-------------------|----------|----------------------|----------------|
| SBP            | Unadjusted        | 1710     | 1.16(-2.58,4.91)     | 0.54           |
|                | Age & sex         | 1710     | 0.59(-3.06,4.24)     | 0.75           |
|                | Above + smoking   | 1707     | 0.61(-3.04,4.26)     | 0.74           |
|                | Above + race      | 1665     | -2.04(-5.68,1.59)    | 0.27           |
|                | Above + income    | 1505     | -3.18(-6.98,0.62)    | 0.10           |
|                | Above + education | 1505     | -3.19(-6.98,0.61)    | 0.10           |
| Glucose        | Unadjusted        | 1706     | 5.05(0.04,10.06)     | 0.05           |
|                | Age & sex         | 1706     | 5.40(0.39,10.41)     | 0.03           |
|                | Above + smoking   | 1702     | 5.36(0.34,10.37)     | 0.04           |
|                | Above + race      | 1660     | 3.61(-1.53,8.76)     | 0.17           |
|                | Above + income    | 1499     | 2.69(-2.73,8.10)     | 0.33           |
|                | Above + education | 1499     | 2.69(-2.73,8.10)     | 0.33           |
| BMI            | Unadjusted        | 1696     | 0.93(-0.22,2.08)     | 0.11           |
|                | Age & sex         | 1696     | 1.00(-0.15,2.15)     | 0.09           |
|                | Above + smoking   | 1694     | 1.04(-0.11,2.19)     | 0.08           |
|                | Above + race      | 1652     | -0.08(-1.21,1.05)    | 0.89           |
|                | Above + income    | 1495     | -0.41(-1.61,0.79)    | 0.50           |
|                | Above + education | 1495     | -0.41(-1.61,0.78)    | 0.50           |
| fRHI           | Unadjusted        | 1229     | -0.04(-0.14,0.07)    | 0.47           |
|                | Age & sex         | 1229     | -0.06(-0.16,0.05)    | 0.27           |
|                | Above + smoking   | 1228     | -0.06(-0.16,0.05)    | 0.28           |
|                | Above + race      | 1196     | -0.01(-0.11,0.10)    | 0.89           |
|                | Above + income    | 1076     | 0.00(-0.11,0.11)     | 0.99           |
|                | Above + education | 1076     | 0.00(-0.11,0.11)     | 1.00           |
| Log-hsCRP      | Unadjusted        | 1608     | 0.17(-0.07,0.41)     | 0.17           |
|                | Age & sex         | 1608     | 0.12(-0.12,0.36)     | 0.31           |
|                | Above + smoking   | 1605     | 0.12(-0.12,0.35)     | 0.35           |
|                | Above + race      | 1566     | -0.03(-0.27,0.21)    | 0.81           |
|                | Above + income    | 1413     | -0.06(-0.31,0.20)    | 0.67           |
|                | Above + education | 1413     | -0.06(-0.31,0.20)    | 0.66           |
| Log-IL6        | Unadjusted        | 1582     | 0.22(0.08,0.37)      | 0.00           |
|                | Age & sex         | 1582     | 0.20(0.06,0.35)      | 0.01           |
|                | Above + smoking   | 1578     | 0.20(0.06,0.35)      | 0.01           |
|                | Above + race      | 1538     | 0.10(-0.04,0.25)     | 0.15           |
|                | Above + income    | 1386     | 0.09(-0.06,0.24)     | 0.26           |
|                | Above + education | 1386     | 0.09(-0.06,0.24)     | 0.26           |

BC – black carbon, SBP – systolic blood pressure, BMI – body mass index, fRHI - Framingham reactive hyperemia index, hsCRP –high sensitivity C-reactive protein, IL6 – interleukin-6
